## 17 **Abstract**

18           We evaluated the efficacy of four simple RNA extraction methods for the detection of  
19 hepatitis C virus (HCV) in plasma samples: silica-membrane-based, magnetic beads-based,  
20 boiling with Diethyl Pyrocarbonate (DEPC)-treated distilled water or a commercial lysis  
21 buffer. HCV RNA was detected using both real time reverse transcription polymerase chain  
22 reaction (RT-PCR) and reverse transcription loop mediated isothermal amplification (RT-  
23 LAMP). The magnetic beads-based extraction can be used as an alternative RNA extraction  
24 method for on-site HCV detection. Boiling with DEPC-treated distilled water was not  
25 appropriate for low HCV load samples and boiling with a lysis buffer was not recommended.

26

27 **Keywords:** RNA extraction; HCV; molecular diagnosis; RT-LAMP; RT-PCR; plasma

## 28 **Introduction**

29           Hepatitis C virus (HCV) is a leading cause of chronic liver disease, cirrhosis, and liver  
30 cancer. The current oral direct-acting antiviral (DAA) combinations can cure 95-99% patients  
31 [1], but the majority of HCV-infected people are unaware of their infection status. Testing for  
32 antibody to HCV (anti-HCV) is insufficient to diagnose a current HCV infection or ongoing  
33 HCV replication. HCV RNA testing is needed. Real time reverse transcription polymerase  
34 chain reaction (RT-PCR) is commonly used for HCV RNA detection/quantification in clinical  
35 practice. However, this test is rarely available for an on-site diagnosis, especially in remote  
36 settings since it requires specific reagents and instruments with high costs. The development  
37 of reverse transcription loop-mediated isothermal amplification assay (RT-LAMP) can  
38 facilitate the access to molecular testing of HCV. Indeed, the clinical sensitivity and specificity  
39 of RT-LAMP has been previously reported as high as 90-100% for HCV detection [2-4]. RT-  
40 LAMP also stands out in terms of rapidity, simplicity, cost-effectiveness, and accessibility,  
41 making it ideal for field or point-of-care use in remote settings where sophisticated and  
42 expensive equipment are not available. However, this technique still requires an effective  
43 nucleic acid extraction and purification steps. Currently, available commercial nucleic acid  
44 extraction kits, mostly based on a silica-based column extraction methodology, are expensive  
45 and require a centrifugation process, limiting the use of RT-LAMP for on-site diagnosis or in  
46 the field. In this study, we evaluated the efficacy of various simple RNA extraction methods  
47 from plasma samples for HCV detection using RT-LAMP and confirmed the presence of HCV  
48 RNA in extracted samples with real time RT-PCR.

## 49 **Materials and methods**

50           This study used leftover plasma samples of 50 HCV-infected individuals who had HCV  
51 viral load testing and genotyping for clinical care at the Faculty of Associated Medical

52 Sciences, Chiang Mai University. HCV viral load was initially measured using a commercial  
53 real-time RT-PCR assay (COBAS AmpliPrep/COBAS TaqMan HCV Test). The study was  
54 approved by the Human Experimentation Committee (Number 17/64) and the Institutional  
55 Biosafety Committee (Number CMUIBC0363004) of Research Institute for Health Sciences,  
56 Chiang Mai University, Thailand.

57 Viral RNA was extracted from plasma samples using four different methods: 1)  
58 NucleoSpin RNA Virus (Macherey-Nagel, Germany) and; 2) NucleoMag Virus kit (Macherey-  
59 Nagel, Germany) following the manufacturer's recommendations; 3) Boiling with water, 100  
60  $\mu$ L plasma were mixed 1:1 with Diethyl Pyrocarbonate (DEPC)-treated distilled water  
61 (Invitrogen, USA) and boiled at 95°C for 10 min [5], the mixture was centrifuged at 8,000  $xg$   
62 for 1 min and supernatant was collected; 4) Boiling with lysis buffer, as above but 100  $\mu$ L  
63 plasma were mixed 1:1 with a commercial lysis buffer (Lysis Buffer RAV1, Macherey-Nagel,  
64 Germany). Yield and purity of RNA extracted according the four methods were measured using  
65 the NanoDrop™ 2000/2000c Spectrophotometer.

66 For RNA detection by real time RT-PCR, four  $\mu$ L of viral nucleic acid extract were  
67 amplified with 400 nM of each HCV forward and reverse primers, and 100 nM of HCV probe  
68 [6] of the sensiFAST Probe Lo-ROX One-Step kit. Amplification was performed on the  
69 Applied Biosystems 7500 instrument as follows: 45°C for 10 min; 95°C for 2 min; 40 cycles  
70 of 95°C for 5 sec and 60°C for 20 sec. The fluorescence signal was measured at 60°C of each  
71 cycle. For RNA amplification by RT-LAMP, five  $\mu$ L of nucleic acid extract were used as  
72 previously described [2]. Briefly, RT-LAMP reaction was processed at 65°C for 60 min. The  
73 result was visualized with the naked eye based on the color change of reaction mixture induced  
74 by pre-added hydroxynaphthol blue. The samples that turned sky blue were considered as  
75 positive, while those that remained purple were considered as negative. To evaluate the  
76 analytical sensitivity of the four extraction methods, 10-fold serial dilutions of plasma with

77 HCV viral load of  $10^6$  IU/mL in 1X phosphate buffer saline were prepared. Aliquots of each  
78 dilution were extracted by the four extraction methods. All RNA extracts were tested for HCV  
79 RNA by both real time RT-PCR and RT-LAMP. Each reaction was performed in triplicate.

## 80 **Results**

81 The four extraction methods showed considerably variable quantities of RNA, boiling  
82 plasma samples with a commercial lysis buffer provided the highest yield of RNA  
83 concentration 695.37 ng/ $\mu$ L and boiling with DEPC-treated distilled water the lowest yield, 0  
84 ng/ $\mu$ L. The purity ranged from 0.14 to 3.46 and was the highest with the silica membrane-  
85 based extraction (Table 1). Analytical sensitivity on triplicate of serial dilutions of HCV RNA  
86 extracts from silica-based membrane and magnetic beads were all detected by real-time RT-  
87 PCR with similar cycle threshold (Ct) and by RT-LAMP at the  $10^6$  concentrations. The  
88 numbers of triplicates detected by both techniques decreased when initial concentrations were  
89  $10^5$  or lower. RNA extracts obtained after boiling in DEPC-distilled water were less well  
90 detected at higher Ct than the silica-membrane and magnetic beads RNA extracts. Though  
91 boiling with a commercial lysis buffer gave the highest RNA yield, none of the RNA extracts  
92 gave a signal by real-time RT-PCR, independently of the initial HCV RNA concentration. The  
93 results from RT-LAMP could not be interpreted since the color turned from purple to sky blue  
94 immediately after adding the extracted RNA to the reaction mix. Thus, boiling with a  
95 commercial lysis buffer was not further evaluated.

96  
97 **Table 1. Efficacy of four different extraction methods for molecular diagnosis of HCV in**  
98 **plasma.**

| Plasma |  | Extraction methods |
|--------|--|--------------------|
|--------|--|--------------------|

| HCV RNA level (IU/mL) |                                             | Silica-membrane based | Magnetic beads-based | Boiling with DEPC-treated distilled water | Boiling with a commercial lysis buffer |
|-----------------------|---------------------------------------------|-----------------------|----------------------|-------------------------------------------|----------------------------------------|
| <b>10<sup>6</sup></b> | concentration (ng/μL)                       | 345.80 ± 11.44        | 6.87 ± 4.03          | 125.63 ± 16.91                            | 695.37 ± 13.62                         |
|                       | purity (260/280)                            | 3.45 ± 0.04           | 1.57 ± 0.12          | 0.87 ± 0.02                               | 1.01 ± 0.04                            |
|                       | Real time RT-PCR, Ct <sup>a</sup> (mean±SD) | 24.91 ± 0.29          | 24.11 ± 1.17         | 29.86 ± 0.77                              | Undetectable                           |
|                       | RT-LAMP, no. of detectable samples (%)      | 3/3 (100)             | 3/3 (100)            | 2/3 (67)                                  | Uninterpreted                          |
| <b>10<sup>5</sup></b> | concentration (ng/μL)                       | 347.73 ± 9.20         | 1.97 ± 0.83          | 28.30 ± 34.75                             | 636.37 ± 1.19                          |
|                       | purity (260/280)                            | 3.44 ± 0.01           | 1.78 ± 0.90          | 0.99 ± 0.28                               | 1.07 ± 0.04                            |
|                       | Real time RT-PCR, Ct (mean±SD)              | 28.27 ± 1.25          | 27.42 ± 0.78         | 32.48 ± 0.98                              | Undetectable                           |
|                       | RT-LAMP, no. of detectable samples (%)      | 1/3 (33)              | 1/3 (33)             | 0/3 (0)                                   | Uninterpreted                          |
| <b>10<sup>4</sup></b> | concentration (ng/μL)                       | 326.90 ± 47.56        | 2.80 ± 0.87          | 0.20 ± 0.14                               | 620.47 ± 10.98                         |
|                       | purity (260/280)                            | 3.43 ± 0.04           | 1.97 ± 0.45          | 1.85 ± 2.06                               | 1.08 ± 0.01                            |
|                       | Real time RT-PCR, Ct (mean±SD)              | 32.84 ± 0.42          | 32.80 ± 1.18         | 34.87 ± 1.01                              | Undetectable                           |
|                       | RT-LAMP, no. of detectable samples (%)      | 0/3 (0)               | 0/3 (0)              | 0/3 (0)                                   | Uninterpreted                          |
| <b>10<sup>3</sup></b> | concentration (ng/μL)                       | 318.33 ± 26.13        | 2.57 ± 0.72          | 0 ± 0.10                                  | 551.37 ± 126.27                        |
|                       | purity (260/280)                            | 3.46 ± 0.01           | 2.48 ± 0.73          | 0.14 ± 0.90                               | 1.10 ± 0.01                            |
|                       | Real time RT-PCR, Ct (mean±SD)              | Undetectable          | Undetectable         | Undetectable                              | Undetectable                           |
|                       | RT-LAMP, no. of detectable samples (%)      | 0/3 (0)               | 0/3 (0)              | 0/3 (0)                                   | Uninterpreted                          |

99 <sup>a</sup>Ct: Cycle threshold.

100 Using real time RT-PCR as measurement, RNA extracted from plasma samples using  
 101 the silica-membrane-based or magnetic beads-based extraction methods gave positive scores  
 102 in 50/50 (100%) (Table 2 and S1 Table). The RNA extracted from boiling with DEPC-treated  
 103 distilled water gave 76% detectable rate (38/50). Using RT-LAMP for HCV detection, RNA

104 extracted with the silica-membrane method showed the best results with 66% detectable rate  
 105 (33/50), while the magnetic beads-based method showed 62% (31/50). Boiling samples with  
 106 DEPC-treated distilled water provided the less number of samples with HCV RNA detected;  
 107 only 7 of 50 (14%) tested positive (Table 2 and S1 Table). RT-LAMP results according to the  
 108 RNA extraction methods, are shown in Fig 1. The analysis of correlation between Ct values  
 109 of RNA extracted from the three different extraction methods showed an excellent correlation  
 110 between Ct values of samples extracted with silica-membrane based vs magnetic beads-based  
 111 methods ( $R^2 = 0.88$ , Fig 2A). The correlation was less good between Ct values of samples  
 112 extracted using silica-membrane based vs boiling with DEPC-treated distilled water methods  
 113 ( $R^2 = 0.60$ , Fig 2B).

114

115 **Table 2. Clinical efficacy evaluation of the viral RNA extraction methods for HCV**  
 116 **detection using real time RT-PCR and RT-LAMP.**

| HCV viral load<br>(log <sub>10</sub> IU/mL) | Extraction methods               |                                        |                                  |                                        |                                           |                                        |
|---------------------------------------------|----------------------------------|----------------------------------------|----------------------------------|----------------------------------------|-------------------------------------------|----------------------------------------|
|                                             | Silica-membrane based            |                                        | Magnetic beads-based             |                                        | Boiling with DEPC-treated distilled water |                                        |
|                                             | Real time RT-PCR, Ct (mean ± SD) | RT-LAMP, no. of detectable samples (%) | Real time RT-PCR, Ct (mean ± SD) | RT-LAMP, no. of detectable samples (%) | Real time RT-PCR, Ct (mean ± SD)          | RT-LAMP, no. of detectable samples (%) |
| 6.01-7.00 (N=10)                            | 24.95 ± 1.64                     | 10/10 (100)                            | 23.19 ± 1.35                     | 10/10 (100)                            | 29.50 ± 1.27                              | 3/10 (30)                              |
| 5.01-6.00 (N=14)                            | 26.76 ± 1.13                     | 13/14 (93)                             | 24.59 ± 0.90                     | 12/14 (86)                             | 30.86 ± 0.93                              | 4/14 (29)                              |
| 4.01-5.00 (N=14)                            | 29.89 ± 1.37                     | 9/14 (64)                              | 27.89 ± 1.03                     | 9/14 (64)                              | 33.83 ± 1.07                              | 0/14 (0)                               |
| 3.01-4.00 (N=12)                            | 32.60 ± 1.44                     | 1/12 (8)                               | 31.21 ± 1.23                     | 0/12 (0)                               | 34.11 ± 0.72                              | 0/12 (0)                               |
| Total (N=50)                                | 50 (100)                         | 33 (66)                                | 50 (100)                         | 31 (62)                                | 38 (76)                                   | 7 (14)                                 |

117

118

119 **Fig 1. RT-LAMP results of all 50 clinical samples tested, according to the RNA extraction**  
120 **methods.**

121

122 **Fig 2. Correlation analysis between cycle threshold (Ct) values obtained by real time RT-**  
123 **PCR using extracted RNA (n =50) from silica-membrane based and magnetic beads-**  
124 **based extraction methods (A) and boiling using DEPC-treated distilled water extraction**  
125 **methods (B).**

126

127

## 128 **Discussion**

129 Our study showed variable sensitivities of molecular HCV detection in plasma samples  
130 depending on the RNA extraction method used. The silica-membrane based extraction method  
131 combines the selective binding properties of a silica-based membrane with the speed of  
132 microspin technology which employs a simple bind-wash-elute process. As noted, the eluates  
133 of this kit contain both viral nucleic acids and carrier RNA which may exceed the amount of  
134 authentic nucleic acids of virus when quantified by photometric method. However, the  
135 extracted RNA from this method is suitable for HCV molecular diagnosis by real time RT-  
136 PCR, and by RT-LAMP when using samples with a high viral load. Previous studies also  
137 showed that this method was suitable for RNA isolation from plasma and ready-for-use in  
138 subsequent reactions for viral detection [7, 8]. This extraction method is fast but the most  
139 expensive of the four extraction methods tested. Furthermore, it requires a centrifuge for the  
140 separation steps. The magnetic beads-based extraction method is based on the reversible  
141 adsorption of nucleic acids to paramagnetic beads. This method uses only magnetic separator  
142 for separation magnetic beads containing nucleic acids and solution. It does not need a



143 centrifugation step but requires careful pipetting to remove the solution from the beads. In this  
144 method, 200  $\mu$ L plasma sample was used, compared to only 100-150  $\mu$ L of sample in the other  
145 three methods which may lead to an increase in the RNA extraction capacity. Previous studies  
146 also recommended the magnetic bead technology for viral RNA extraction from serum or  
147 plasma [9, 10]. Our results showed that Ct values from HCV samples extracted by magnetic  
148 beads-based method and silica-membrane based method correlated well. Thus, it can be used  
149 as an alternative extraction method. However, samples with low viral loads may cause a false  
150 negative result when used with RT-LAMP detection. Boiling is a simple and rapid method to  
151 release viral RNA from samples, it takes about 15 min. Previous studies suggested that simple  
152 or direct boiling without any additional purification steps can be used as an alternative RNA  
153 isolation method to detect viral infections in clinical samples [5, 11]. However, this method  
154 yielded the lowest RNA concentration and purity, as compared to others. This might be  
155 explained by a degradation of RNA during boiling and no additional step for concentration.  
156 Plasma samples showed a slightly decreased sensitivity when processed by boiling prior to  
157 amplification. When using real time RT-PCR for detection, the Ct values from HCV samples  
158 extracted by boiling were slightly higher than those of RNA extracts by silica-membrane and  
159 magnetic beads-based extraction methods and did not strongly correlate. Although the boiling  
160 method could be used as a cost-effective alternative to expensive extraction methods, it can  
161 only be used when samples have a high viral load. Boiling samples with a commercial lysis  
162 buffer provided the highest RNA concentration, a quite low purity of RNA. This might be due  
163 to the RNA carrier contained in the lysis buffer and the absence of additional step to remove  
164 the lysis buffer components or purification prior to amplification. We were unable to detect  
165 any HCV RNA in all RNA extracts and the results of RT-LAMP could not be interpreted. This  
166 may be due to an effect of inhibitors created or released by boiling. Thus, boiling plasma  
167 samples with a commercial lysis buffer cannot be used for RNA extraction in viral detection.

168 The limitation of this study may be the relatively low number of samples and the diversity of  
169 HCV genotypes tested.

170 In summary, the magnetic beads-based extraction method can be used as an alternative  
171 method of plasma RNA extraction for HCV detection. This method is simple, rapid,  
172 inexpensive, and does not require a centrifugation process which makes it suitable for on-site  
173 diagnosis or in the field when combined with RT-LAMP technique. This approach will  
174 contribute to identify new HCV viremic cases and to reaching the long-term goal of HCV  
175 eradication.

176

## 177 **Acknowledgements**

178 We would like to thank the Division of Clinical Microbiology, Faculty of Associated  
179 Medical Sciences, Chiang Mai University for specimen processing.

## 180 **Funding**

181 This study was supported by Chiang Mai University, Thailand.

182 **Competing interests:** The authors have declared that no competing interests exist.

## 183 **Author contributions**

184 **Conceptualization:** Sayamon Hongjaisee, Woottichai Khamduang

185 **Project administration:** Sayamon Hongjaisee

186 **Investigation:** Sayamon Hongjaisee, Woottichai Khamduang

187 **Methodology:** Yosita Jabjainai, Suthasinee Sakset

188 **Formal analysis:** Sayamon Hongjaisee, Yosita Jabjainai, Suthasinee Sakset

189 **Data curation:** Sayamon Hongjaisee

190 **Validation and Visualization:** Sayamon Hongjaisee, Kanya Preechasuth, Woottichai  
191 Khamduang

192 **Supervision:** Nicole Ngo-Giang-Huong, Woottichai Khamduang

193 **Writing – original draft:** Sayamon Hongjaisee, Woottichai Khamduang

194 **Writing – review & editing:** Sayamon Hongjaisee, Yosita Jabjainai, Suthasinee Sakset, Kanya  
195 Preechasuth, Nicole Ngo-Giang-Huong, Woottichai Khamduang

196

## 197 **References**

198 1. Luo A, Xu P, Wang J, Li Z, Wang S, Jiang X, et al. Efficacy and safety of direct-  
199 acting antiviral therapy for chronic hepatitis C genotype 6: A meta-analysis. *Medicine*.  
200 2019;98(20):e15626. Epub 2019/05/18. doi: 10.1097/md.00000000000015626.  
201 PubMed PMID: 31096473; PubMed Central PMCID: PMC6531202.

202 2. Hongjaisee S, Doungjinda N, Khamduang W, Carraway TS, Wipasa J, Debes JD, et  
203 al. Rapid visual detection of hepatitis C virus using a reverse transcription loop-  
204 mediated isothermal amplification assay. *International journal of infectious diseases :  
205 IJID : official publication of the International Society for Infectious Diseases*.  
206 2021;102:440-5. Epub 2020/11/02. doi: 10.1016/j.ijid.2020.10.082. PubMed PMID:  
207 33130211; PubMed Central PMCID: PMC67794100.

208 3. Nyan DC, Swinson KL. A method for rapid detection and genotype identification of  
209 hepatitis C virus 1-6 by one-step reverse transcription loop-mediated isothermal  
210 amplification. *International journal of infectious diseases : IJID : official publication  
211 of the International Society for Infectious Diseases*. 2016;43:30-6. Epub 2015/12/22.  
212 doi: 10.1016/j.ijid.2015.12.002. PubMed PMID: 26686938.

213 4. Zhao N, Liu J, Sun D. Detection of HCV genotypes 1b and 2a by a reverse  
214 transcription loop-mediated isothermal amplification assay. *Journal of medical*

- 215 virology. 2017;89(6):1048-54. Epub 2016/12/10. doi: 10.1002/jmv.24747. PubMed  
216 PMID: 27935066.
- 217 5. Fereidouni SR, Starick E, Ziller M, Harder TC, Unger H, Hamilton K, et al. Sample  
218 preparation for avian and porcine influenza virus cDNA amplification simplified:  
219 Boiling vs. conventional RNA extraction. Journal of virological methods.  
220 2015;221:62-7. Epub 2015/05/02. doi: 10.1016/j.jviromet.2015.04.021. PubMed  
221 PMID: 25929989.
- 222 6. Chen L, Li W, Zhang K, Zhang R, Lu T, Hao M, et al. Hepatitis C Virus RNA Real-  
223 Time Quantitative RT-PCR Method Based on a New Primer Design Strategy. The  
224 Journal of molecular diagnostics : JMD. 2016;18(1):84-91. Epub 2015/11/28. doi:  
225 10.1016/j.jmoldx.2015.07.009. PubMed PMID: 26612712.
- 226 7. Gonzalez-Perez I, Armas Cayarga A, García de la Rosa I, Josefina González González  
227 Y. Homemade viral RNA isolation protocol using silica columns: a comparison of  
228 four protocols. Analytical biochemistry. 2007;360(1):148-50. Epub 2006/11/23. doi:  
229 10.1016/j.ab.2006.10.022. PubMed PMID: 17113029.
- 230 8. Li X, Mauro M, Williams Z. Comparison of plasma extracellular RNA isolation kits  
231 reveals kit-dependent biases. BioTechniques. 2015;59(1):13-7. Epub 2015/07/15. doi:  
232 10.2144/000114306. PubMed PMID: 26156779.
- 233 9. Albertoni GA, Arnoni CP, Barboza Araujo PR, Andrade SS, Carvalho FO, Castello  
234 Girão MJB, et al. Magnetic bead technology for viral RNA extraction from serum in  
235 blood bank screening. The Brazilian Journal of Infectious Diseases. 2011;15(6):547-  
236 52. doi: [https://doi.org/10.1016/S1413-8670\(11\)70249-5](https://doi.org/10.1016/S1413-8670(11)70249-5).
- 237 10. Pichl L, Heitmann A, Herzog P, Oster J, Smets H, Schottstedt V. Magnetic bead  
238 technology in viral RNA and DNA extraction from plasma minipools. Transfusion.

239 2005;45(7):1106-10. Epub 2005/07/01. doi: 10.1111/j.1537-2995.2005.04356.x.

240 PubMed PMID: 15987354.

241 11.Jitendra K B, Rajeev R, Biswajit D, Saravanan S, Bramhadev P. The direct boil RT-

242 mPCR: A simple and rapid method for detection of foot-and-mouth disease virus

243 genome in clinical samples without nucleic acid extraction. Indian journal of

244 veterinary pathology. 2017;41(1):12-7.

245

## 246 **Supporting information**

247 **S1 Table. Clinical efficacy evaluation of the viral RNA extraction methods for HCV**

248 **detection using real time RT-PCR and RT-LAMP by samples**

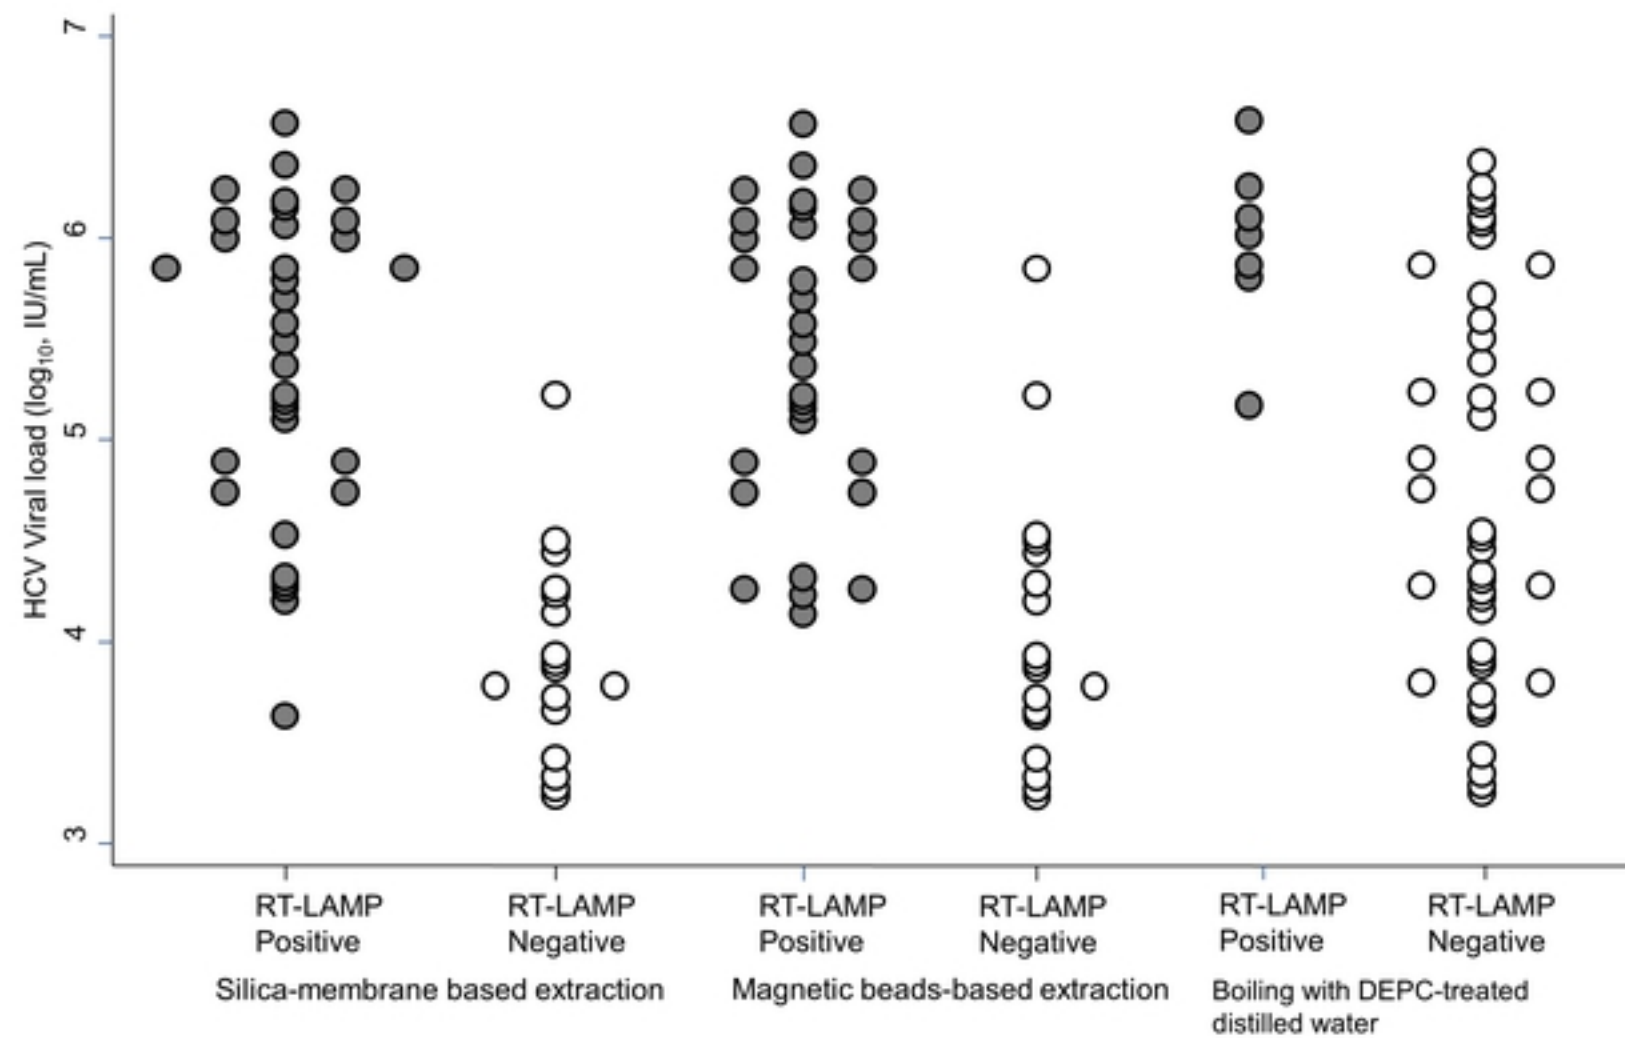

Figure 1

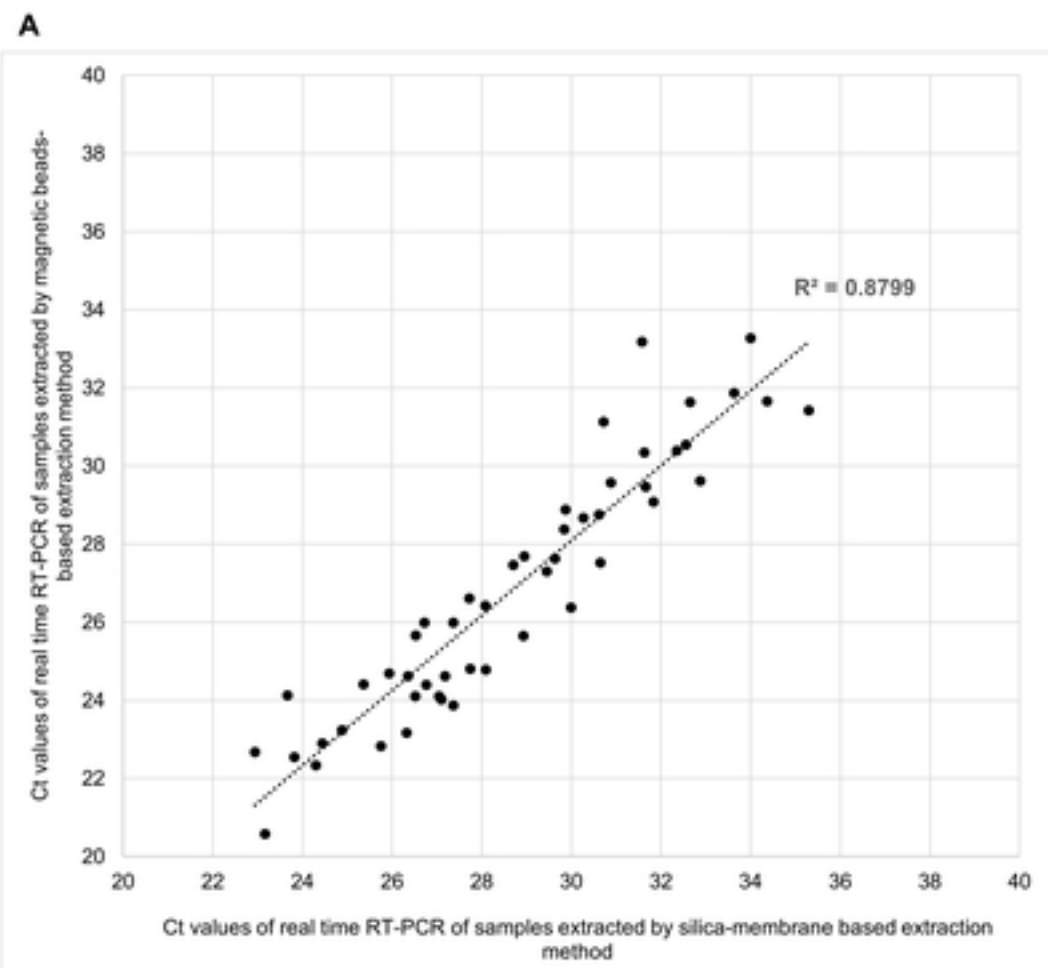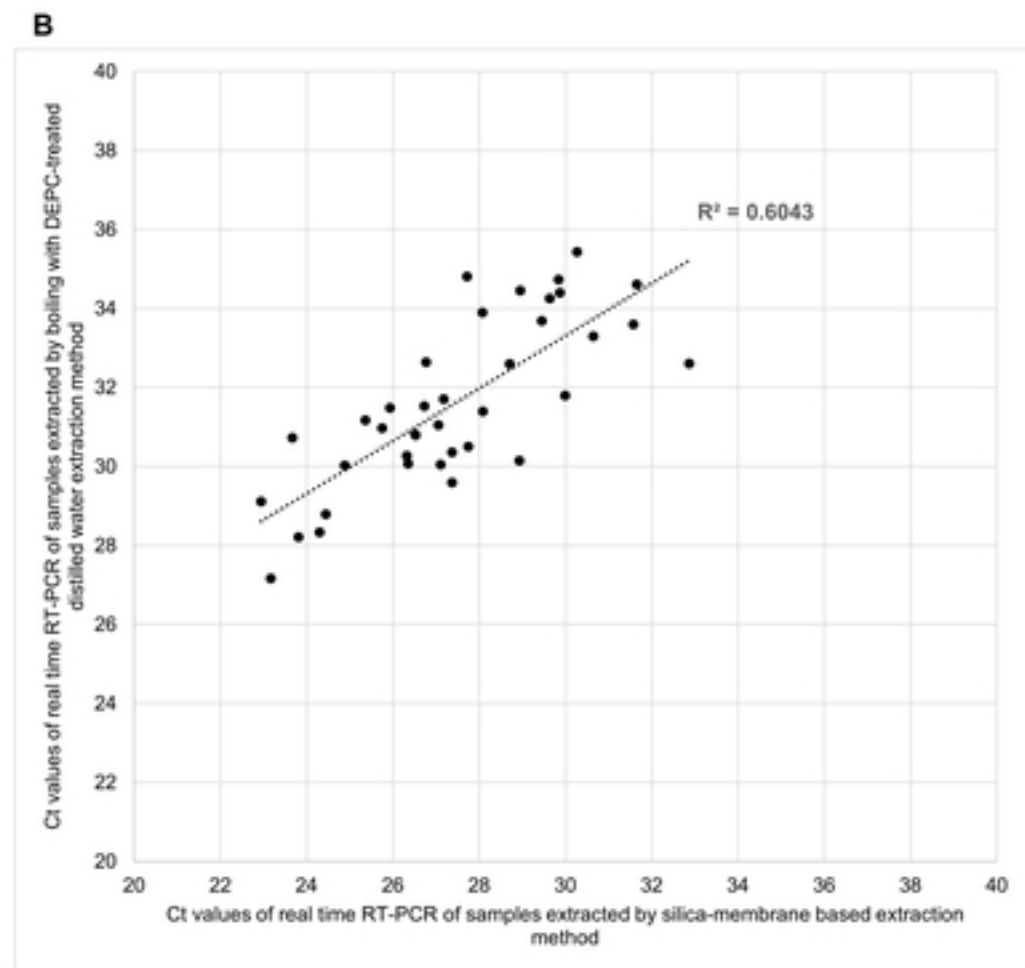

Figure 2
